# Supplementary material for: Screening & diagnosing errors in longitudinal measures of body size
Source: medRxiv preprint, doi:10.1101/2020.11.19.20234872, version 1 (2020-11-19)
Supplement: Supplemental File 1 [file 234872_file02.docx]

**Online Supplementary Material File 1**

1. **Scoping Review**

**
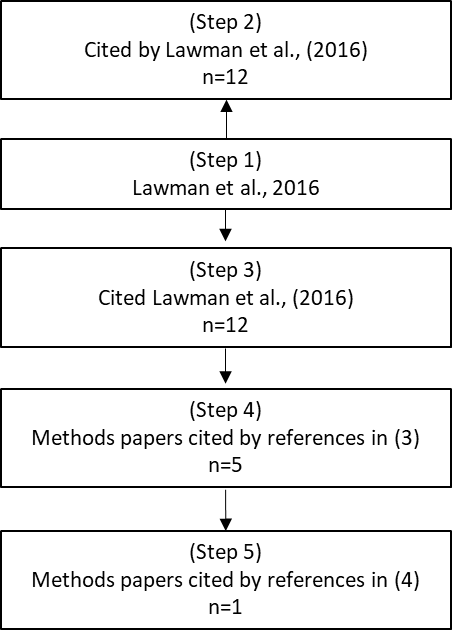
**

Figure S1. Schematic of literature search for scoping methods used to clean longitudinal height and weight data. Excludes citations from editorials.

References:

Step 1 (1)

Step 2 (2-13)

Step 3 (14-25)

Step 4 (26-30)

Step 5 (31)

Table S1. Taxonomy of different approaches used to clean height and weight or body mass index

| **Design of method** | **Marker/ indicator used to screen/ diagnose errors** | **Reference for threshold:** | **How was threshold selected?** | **Example(s)** |
| --- | --- | --- | --- | --- |
| Cross-sectional  trimming | Absolute value (Xi) | Biologically impossible size | Impossible limits | BMI >40 or BMI<8kg/m2 (6)  HT<30.5cm (7)  WT<4.5kg (5) |
|  |  | Internally derived | Arbitrary statistical-based limits | |WTi|> 99th percentile+200% of the median (7)  HT< 1st percentile HT for age minus 30.5cm (7)  Dixon test (29); |
|  | Age & sex standardised values (SDi) | External population | Arbitrary statistical-based limits | |Modified CDC SDi|>WHO threshold  (2, 9, 27)|CDC SDi|>6 (3) |
|  |  | External population | Biologically impossible limits | |SDi|>25 (17) |
|  |  | Internally derived | Arbitrary statistical-based limits | |SDi|>3 (29) |
|  | Data entry error logic checks | Logical inconsistencies | Based on potential data entry error mechanisms | HT-WT switch; 2 values for HT entered (17); digit errors, transposed digits (22) |
| Longitudinal  trimming | Absolute change (ΔX) |  | Biologically impossible change | ΔHT<-1 inch (3) |
|  |  | External population | Arbitrary statistical-based limits | ΔX greater than value corresponding to 3 z-scores on Tanner or WHO growth velocity charts (17) |
|  | Age & sex standardised values (SDi) | External population | Arbitrary statistical-based limits | ΔHT>3SD, |ΔBMI|>3SD (3) |
|  |  | Internally derived | Arbitrary statistical-based limits | Top and bottom 1% of BMI change (8). |
|  | Relative change (% ΔX) | Internally derived | Based on non-linear part of the cumulative distribution of marker | % ΔX>threshold for WT gain and loss (16) |
|  | Ratio of Euclidean distances between 3 measures | Internally derived | Based on non-linear part of the cumulative distribution of marker | |Ratio of distances|> threshold; |Difference in distances|> threshold (16) |
|  | Error residuals estimated from multilevel growth model (Eij) | Internally derived | Arbitrary statistical-based limits | |Studentised Eij|>6 based on linear piece-wise linear spline MLM (14); |Studentised Eij| exceeding ordinal range of thresholds reflecting increasing likelihood of implausibility (29) |
|  | Conditional growth (Xi|Xi-1) estimated from multilevel model | Internally derived | Arbitrary statistical-based limits | |(Xi|Xi-1)|>4SD based on MLM linear spline model (30) |
|  | Jackknife residual estimated from ordinary regression on each individual | Internally derived | Arbitrary statistical-based limits | |Jackknifed residual| > 5 based on regression of X for each child as a function of age (21) |
|  | Deviation in SD score from individual’s smoothed (expected) SD trajectory. | Internally derived | iteratively selected conservative cut-points based on judgement of author | Deviation of CDC SD score from individual’s exponentially weighted moving average trajectory (17) |
|  | Data entry error logic checks | Logical inconsistencies | Based on potential data entry error mechanisms | Measures carried forward (17) |

CDC: Centre for Disease Control and Prevention; MLM: Multi-level model;

1. **Data harmonisation**

Information at birth was available from both the Medical Birth Registry (MBR) and Health cards. There was only small disagreement between sources, for example, <1% of observations disagreed by more than 200g for birth weight and >1cm for birth length. However, the MBR data contained more children and is the more widely used and official record of birthweight, and so was kept and health card information used only when there was no MBR record.

The clothing correction was applied to the school clinic data to align with the health card data as per the National Measurement guidelines. This produces the greatest degree of harmonisation between and within cohorts.

Information at 8yrs of age was available from both the school research clinic and health card in the 2010 (n=52) and 2015 cohorts (n=1158). To harmonise the structure of primary and secondary measurements around this age between cohorts with respect to the different information sources, measurements from the health card were removed if they occurred within 9 months of the school clinic.

**3 Data Structure**

Table S2 Number of observations by measurement schedule

|  | **2010** |  | **2015** |  | **2017** |  |
| --- | --- | --- | --- | --- | --- | --- |
| **Target age** | **n** | **%** | **n** | **%** | **n** | **%** |
| birth | 3182 | 10.2 | 3076 | 8.1 | 1741 | 9.4 |
| 1-5d (2-4d) | 7 | 0.0 | 20 | 0.1 | 13 | 0.1 |
| 6-21d (7-10d) | 25 | 0.1 | 170 | 0.4 | 22 | 0.1 |
| 6wks (21-67d) | 2525 | 8.1 | 2607 | 6.8 | 1585 | 8.6 |
| 3m (68-137d) | 2655 | 8.5 | 4321 | 11.3 | 1697 | 9.2 |
| 5m (138-167d) | 308 | 1.0 | 2078 | 5.4 | 1120 | 6.1 |
| 6m (168-243d) | 2657 | 8.6 | 3888 | 10.2 | 464 | 2.5 |
| 10m (244-335d) | 2484 | 8.0 | 3379 | 8.8 | 52 | 0.3 |
| 12m (336-446d) | 2791 | 9.0 | 3044 | 8.0 | 1665 | 9.0 |
| 15-18m (447-640d) | 3267 | 10.5 | 3039 | 8.0 | 1572 | 8.5 |
| 2y (641-914d) | 2444 | 7.9 | 2268 | 5.9 | 1374 | 7.4 |
| 3y (915-1278d) | 618 | 2.0 | 669 | 1.8 | 257 | 1.4 |
| 4y (1279-1643d) | 2102 | 6.8 | 2570 | 6.7 | 1490 | 8.1 |
| 5/6y (1644-2557d) | 2768 | 8.9 | 3420 | 9.0 | 1794 | 9.7 |
| 8y (2558-3653d) Health Card | 52 | 0.2 | 299 | 0.8 | 1678 | 9.1 |
| 8y (2558-3653d) School | 3182 | 10.2 | 3335 | 8.7 | 0 | 0.0 |
| 13y (3654-5844d) School | 0 | 0.0 | 0.0 | 0.0 | 1892 | 10.2 |

Figure S2. Histograms of measurement ages in each cohort

Table S3. Frequency of number of measures per child in each cohort.

| N measures | Cohort 2010 | | | | Cohort 2015 | | | | Cohort 2017 | | | |
| --- | --- | --- | --- | --- | --- | --- | --- | --- | --- | --- | --- | --- |
| Weight |  | Height |  | Weight |  | Height |  | Weight |  | Height |  |
| n | Cum. % | n | Cum. % | n | Cum. % | n | Cum. % | n | Cum. % | n | Cum. % |
| 0 | 0 | 0 | 0 | 0 | 0 | 0 | 0 | 0 | 1 | 0,1 | 0 | 0,0 |
| 1 | 116 | 3,6 | 122 | 3,8 | 56 | 1,7 | 64 | 1,9 | 45 | 2,4 | 45 | 2,4 |
| 2 | 130 | 7,7 | 124 | 7,7 | 216 | 8,1 | 208 | 8,1 | 63 | 5,7 | 63 | 5,7 |
| 3 | 5 | 7,9 | 5 | 7,9 | 104 | 11,3 | 107 | 11,4 | 25 | 7,0 | 27 | 7,1 |
| 4 | 11 | 8,2 | 17 | 8,4 | 129 | 15,1 | 128 | 15,2 | 24 | 8,3 | 23 | 8,3 |
| 5 | 36 | 9,4 | 43 | 9,8 | 108 | 18,4 | 106 | 18,4 | 27 | 9,7 | 27 | 9,7 |
| 6 | 64 | 11,4 | 74 | 12,1 | 76 | 20,6 | 81 | 20,8 | 20 | 10,7 | 24 | 11,0 |
| 7 | 76 | 13,8 | 102 | 15,3 | 44 | 22,0 | 45 | 22,1 | 33 | 12,5 | 40 | 13,1 |
| 8 | 124 | 17,7 | 188 | 21,2 | 65 | 23,9 | 60 | 23,9 | 48 | 15,0 | 86 | 17,6 |
| 9 | 295 | 26,9 | 473 | 36,1 | 58 | 25,6 | 60 | 25,7 | 148 | 22,8 | 208 | 28,5 |
| 10 | 720 | 49,5 | 772 | 60,3 | 116 | 29,1 | 124 | 29,4 | 461 | 46,9 | 523 | 55,9 |
| 11 | 1009 | 81,2 | 877 | 87,9 | 186 | 34,7 | 186 | 35,0 | 987 | 98,7 | 822 | 99,0 |
| 12 | 495 | 96,8 | 327 | 98,1 | 348 | 45,1 | 348 | 45,4 | 25 | 100,0 | 19 | 100,0 |
| 13 | 99 | 99,9 | 59 | 100,0 | 431 | 58,0 | 433 | 58,4 | 0 | 100,0 | 0 | 100,0 |
| 14 | 3 | 100,0 | 0 | 100,0 | 450 | 71,5 | 448 | 71,8 | 0 | 100,0 | 0 | 100,0 |
| >14 | 0 | 100,0 | 0 | 100,0 | 951 | 100,0 | 940 | 100,0 | 0 | 100,0 | 0 | 100,0 |
| Total | 3183 | 100 | 3183 | 100 | 3338 | 100 | 3338 | 100 | 1907 | 100 | 1907 | 100 |

Table S4. Glossary of terms for describing cleaning processes (adapted from Van den Broeck et al., 2004(28))

| Data flow | Passage of data from measurement to analysis dataset |
| --- | --- |
| Quality control | Activities that occur during or after data collection to correct data errors |
| Data cleaning | Dealing with problems once they have occurred in the database |
| Inlier | A data value within an acceptable range |
| Outlier | A data value considered extreme |
| Impossible value | A data value that cannot be true |
| Implausible value | A data value that is subjectively extremely unlikely |
| Suspicious value | A data value that is possible but has a very low probability of occurring. |
| Analysis dataset | Dataset after cleaning |

Table S5. Frequency of duplicates in each cohort

|  | **2010** | **2015** | **2017** |
| --- | --- | --- | --- |
| N (%) | 117 (0.4%) | 772 (2.0%) | 86 (0.5%) |
| Total Assessments | 31067 | 38183 | 18474 |

Figure S3. Predicted % of children with errors by county as estimated from multilevel logistic models (adjusted for number of measurements).

References

1. Lawman HG, Ogden CL, Hassink S, Mallya G, Vander Veur S, Foster GD. Comparing Methods for Identifying Biologically Implausible Values in Height, Weight, and Body Mass Index Among Youth. American journal of epidemiology. 2015;182(4):359-65.

2. Centers for Disease Control P. Modified z-scores in the CDC growth charts2012; (18/12/2012).

3. Kim J, Must A, Fitzmaurice GM, Gillman MW, Chomitz V, Kramer E, et al. Incidence and remission rates of overweight among children aged 5 to 13 years in a district-wide school surveillance system. American journal of public health. 2005;95(9):1588-94.

4. Lawman HG, Mallya G, Veur SV, McCoy T, Colby L, Sanders T, et al. Trends in relative weight over 1 year in low-income urban youth. Obesity. 2015;23(2):436-42.

5. Lo JC, Maring B, Chandra M, Daniels SR, Sinaiko A, Daley MF, et al. Prevalence of obesity and extreme obesity in children aged 3-5 years. Pediatr Obes. 2014;9(3):167-75.

6. Lobstein TJ, James WP, Cole TJ. Increasing levels of excess weight among children in England. International journal of obesity and related metabolic disorders : journal of the International Association for the Study of Obesity. 2003;27(9):1136-8.

7. Smith N, Coleman KJ, Lawrence JM, Quinn VP, Getahun D, Reynolds K, et al. Body weight and height data in electronic medical records of children. International journal of pediatric obesity : IJPO : an official journal of the International Association for the Study of Obesity. 2010;5(3):237-42.

8. Sturm R. Increases in morbid obesity in the USA: 2000-2005. Public Health. 2007;121(7):492-6.

9. WHO. Physical Status: the use and interpretation of anthropometry. Report of a WHO Expert Committee. 1995.

10. Conde WL, Monteiro CA. Body mass index cutoff points for evaluation of nutritional status in Brazilian children and adolescents. J Pediatr (Rio J). 2006;82(4):266-72.

11. National Health and Nutrition Examination Survey. 2001–2002 data documentation, codebook, and frequencies: body measurements2004. Available from: <http://www.cdc.gov/nchs/nhanes/nhanes2001-2002/BMX_B.htm>.

12. Youth Risk Behaviour Surveillance System. 2013 YRBS data user’s guide.2012 18/12/2019. Available from: <ftp://ftp.cdc.gov/pub/data/yrbs/2011/YRBS_2011_National_User_Guide.pdf>.

13. Field AE, Austin SB, Taylor CB, Malspeis S, Rosner B, Rockett HR, et al. Relation between dieting and weight change among preadolescents and adolescents. Pediatrics. 2003;112(4):900-6.

14. Boone-Heinonen J, Tillotson CJ, O'Malley JP, Marino M, Andrea SB, Brickman A, et al. Not so implausible: impact of longitudinal assessment of implausible anthropometric measures on obesity prevalence and weight change in children and adolescents. Annals of epidemiology. 2019;31:69-74.e5.

15. Boswell N, Byrne R, Davies PSW. Eating behavior traits associated with demographic variables and implications for obesity outcomes in early childhood. Appetite. 2018;120:482-90.

16. Chen S, Banks WA, Sheffrin M, Bryson W, Black M, Thielke SM. Identifying and categorizing spurious weight data in electronic medical records. The American journal of clinical nutrition. 2018;107(3):420-6.

17. Daymont C, Ross ME, Russell Localio A, Fiks AG, Wasserman RC, Grundmeier RW. Automated identification of implausible values in growth data from pediatric electronic health records. J Am Med Inform Assoc. 2017;24(6):1080-7.

18. Freedman DS, Lawman HG, Galuska DA, Goodman AB, Berenson GS. Tracking and Variability in Childhood Levels of BMI: The Bogalusa Heart Study. Obesity. 2018;26(7):1197-202.

19. Katzow M, Messito MJ, Mendelsohn AL, Scott MA, Gross RS. The Protective Effect of Prenatal Social Support on Infant Adiposity in the First 18 Months of Life. J Pediatr. 2019;209:77-84.

20. Morita A, Ochi M, Isumi A, Fujiwara T. Association between grandparent coresidence and weight change among first-grade Japanese children. Pediatr Obes. 2019;14(8):e12524.

21. Shi J, Korsiak J, Roth DE. New approach for the identification of implausible values and outliers in longitudinal childhood anthropometric data. Annals of epidemiology. 2018;28(3):204-11.e3.

22. Woolley CSC, Handel IG, Bronsvoort BM, Schoenebeck JJ, Clements DN. Is it time to stop sweeping data cleaning under the carpet? A novel algorithm for outlier management in growth data. PloS one. 2020;15(1):e0228154.

23. Fisher JO, Serrano EL, Foster GD, Hart CN, Davey A, Bruton YP, et al. Title: efficacy of a food parenting intervention for mothers with low income to reduce preschooler's solid fat and added sugar intakes: a randomized controlled trial. The international journal of behavioral nutrition and physical activity. 2019;16(1):6.

24. Boswell N, Byrne R, Davies PSW. An examination of children's eating behaviours as mediators of the relationship between parents' feeding practices and early childhood body mass index z-scores. Obes Sci Pract. 2019;5(2):168-76.

25. Phan HTT, Borca F, Cable D, Batchelor J, Davies JH, Ennis S. Automated data cleaning of paediatric anthropometric data from longitudinal electronic health records: protocol and application to a large patient cohort. Scientific reports. 2020;10(1):10164.

26. Freedman DS, Lawman HG, Pan L, Skinner AC, Allison DB, McGuire LC, et al. The prevalence and validity of high, biologically implausible values of weight, height, and BMI among 8.8 million children. Obesity. 2016;24(5):1132-9.

27. Freedman DS, Lawman HG, Skinner AC, McGuire LC, Allison DB, Ogden CL. Validity of the WHO cutoffs for biologically implausible values of weight, height, and BMI in children and adolescents in NHANES from 1999 through 2012. The American journal of clinical nutrition. 2015;102(5):1000-6.

28. Van den Broeck J, Cunningham SA, Eeckels R, Herbst K. Data cleaning: detecting, diagnosing, and editing data abnormalities. PLoS medicine. 2005;2(10):e267.

29. Welch C, Petersen I, Walters K, Morris RW, Nazareth I, Kalaitzaki E, et al. Two-stage method to remove population- and individual-level outliers from longitudinal data in a primary care database. Pharmacoepidemiology and drug safety. 2012;21(7):725-32.

30. Yang S, Hutcheon JA. Identifying outliers and implausible values in growth trajectory data. Annals of epidemiology. 2016;26(1):77-80 e1-2.

31. Gray CL, Robinson WR. Throwing out the baby with the bathwater?: Comparing 2 approaches to implausible values of change in body size. Epidemiology. 2014;25(4):591-4.
